# Supplementary material for: Utilization of AlphaFold2 to Predict MFS Protein Conformations after Selective Mutation
Source: MDPI journal article supplement (doi:10.3390/ijms23137235), 2022-06-29
Supplement: s1 [file s1]

## Supplementary Information

# Utilization of AlphaFold2 to Predict MFS Protein Conformations after Selective Mutation

**Qingjie Xiao** <sup>1,†</sup>, **Mengxue Xu** <sup>2,3,†</sup>, **Weiwei Wang** <sup>1</sup>, **Tingting Wu** <sup>1</sup>, **Weizhe Zhang** <sup>1</sup>, **Wenming Qin** <sup>1,\*</sup>  
and **Bo Sun** <sup>1,2,\*</sup>

<sup>1</sup> Shanghai Advanced Research Institute, Chinese Academy of Sciences, Shanghai 201204, China; xiaoqj@sari.ac.cn (Q.X.); wangww@sari.ac.cn (W.W.); wutt@sari.ac.cn (T.W.); zhangweizhe@sari.ac.cn (W.Z.)

<sup>2</sup> Shanghai Institute of Applied Physics, Chinese Academy of Sciences, Shanghai 201800, China; 2018216024@njau.edu.cn

<sup>3</sup> Department of Microbiology, College of Life Sciences, Nanjing Agricultural University, Nanjing 210095, China

\* Correspondence: qinwenming@sari.ac.cn (W.Q.); sunb@sari.ac.cn (B.S.)

† These authors contributed equally to this work.

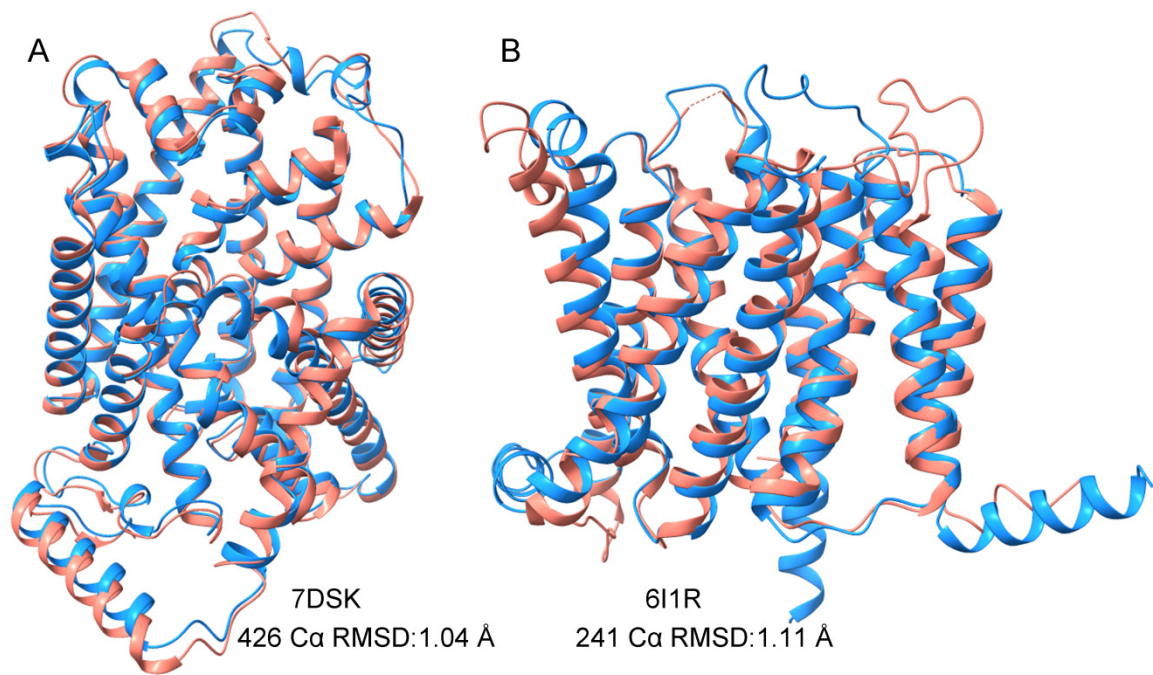

Figure S1. The compare for the predicted structure and the experimental structure. (A) The superposition for the structure of mutant (UniProt ID: P78381) and the member (PDB ID: 7DSK) of the same family. (B) The superposition for the structure of mutant (UniProt ID: Q9UHI5) and the member (PDB ID: 6I1R) of the same family. The dodger blue cartoon showed the mutant, and The salmon cartoon showed the experimental structure.

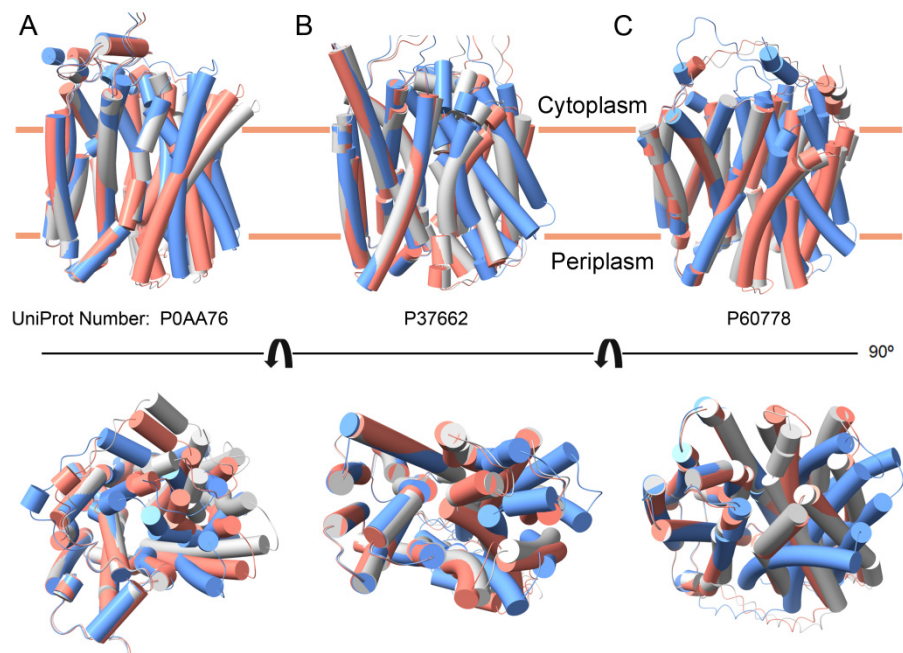

Figure S2. Superposition of multiple conformations. The Uniprot ID are P0AA76 for (A), P37662 for (B), P60778 for (C). The dodger blue cartoon showed the mutant with the A36/S39/ I161/P264/N265 for P0AA76, S31/S46/G235/V256/S357 for P37662, and G28/S43/S46/A153/P230 for P60778. The salmon cartoon showed the mutant with the S64/G134/D275 for P0AA76, S39/I161/N265 for P37662, and V42/P149/230 for P60778. the silver cartoon showed wild type.

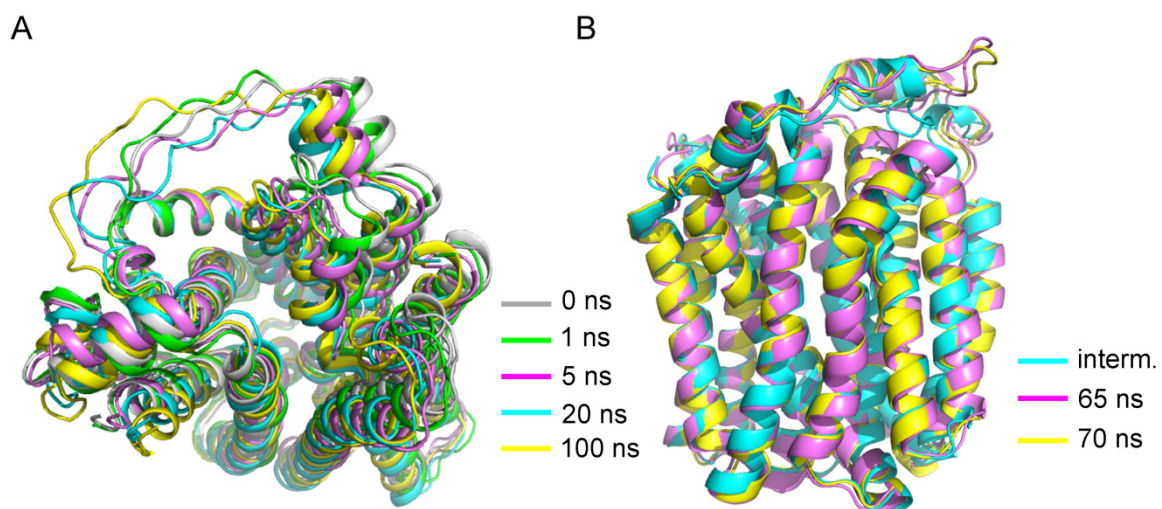

Figure S3. MD for P0AA76 with the inward conformaton. (A) Superposition of structure from 0 ns, 1 ns, 5 ns, 20 ns, 100 ns. (B) Superposition of structure for the predicted intermediate conformation and MD structure. Intern refer to the intermediate conformation.

Table S1. Statistics for mutation site, RMSD and pLDDT score of 69 MFS members in *E. coli* and 2 MFS members in other species.

| Number | Mutation site             | Conformation<br>(wild type) | Conformation<br>(mutant) | PLDDT | RMSD (Å)   |
|--------|---------------------------|-----------------------------|--------------------------|-------|------------|
| P39196 | P52/V240/T256             | inward                      | outward                  | 94.0  | 4.05 (383) |
| P23910 | L26/T148/P224             | inward                      | outward                  | 92.9  | 3.90 (378) |
| Q47142 | G347/S28/S144             | inward                      | outward                  | 92.1  | 4.97 (379) |
| P77389 | G112/A128/D262/S328       | outward                     | inward                   | 92.10 | 4.21 (384) |
| P32135 | I32/L154/P243/G257/D376   | inward                      | outward                  | 91.6  | 5.74 (407) |
| P28246 | P31/L33/P237              | inward                      | outward                  | 91.5  | 3.84 (372) |
| P37758 | S54/P296/P419             | inward                      | outward                  | 91.5  | 3.58 (454) |
| P39386 | P34/P51/V235              | inward                      | outward                  | 91.1  | 3.82 (379) |
| P0AFF4 | S27/ T233/S254            | inward                      | outward                  | 91.0  | 4.79 (415) |
| P0AEY8 | P38/P55/A240/P243         | inward                      | outward                  | 90.5  | 2.59 (358) |
| P10903 | V60/T78/P422              | Inward<br>occluded          | outward<br>occluded      | 90.5  | 1.40 (452) |
| P0ADL1 | A130/P143/T331            | outward                     | inward                   | 90.4  | 5.20 (388) |
| P69367 | V38/A45/P232              | inward                      | outward                  | 90.4  | 4.60 (391) |
| P37662 | S31/S46/G235/V256/S357    | occluded                    | outward                  | 90.3  | 2.60 (382) |
| P76628 | G49A235/G251/A357         | inward                      | outward                  | 90.1  | 4.36 (376) |
| P37597 | V113/A319/A333            | outward                     | inward                   | 89.9  | 5.08 (387) |
| P52067 | P132/S135/S151            | outward                     | Inward                   | 89.9  | 3.85 (402) |
| Q46916 | S40/A167/G405             | Inward                      | outward                  | 89.8  | 5.45 (450) |
| P31122 | S37/T47/L251              | inward                      | outward                  | 89.3  | 3.37(384)  |
| P39352 | A122/V129/P328            | outward                     | inward<br>occluded       | 89.3  | 2.84 (398) |
| P0AE24 | S138/I382/S385            | occluded                    | Inward                   | 89.2  | 1.85 (421) |
| P0AA76 | A36/S39/ I161/ P264/N265/ | inward                      | outward                  | 89.1  | 4.38 (428) |
| P76198 | P153/P237/P356            | inward                      | outward                  | 89    | 5.93 (419) |
| P37621 | G56/A167/T239/A254        | inward                      | outward                  | 89    | 4.60 (389) |
| P60778 | G28/S43/S46/A153/P230     | inward                      | outward                  | 89    | 4.67 (393) |
| P21503 | T27/A34/L225              | inward                      | outward                  | 88.9  | 4.96 (370) |

|        |                        |          |                     |      |             |
|--------|------------------------|----------|---------------------|------|-------------|
| P77549 | T135/S146/P321         | outward  | Inward              | 88.6 | 4.05 (386)  |
| Q46909 | A56/P271/P391          | inward   | outward             | 88.5 | 3.76 (420)  |
| P77726 | G337/A122/S325         | outward  | inward              | 88.5 | 4.43 (415)  |
| P0AA80 | S38/ S165/I275         | inward   | outward             | 88.4 | 5.67 (438)  |
| P0AEP1 | L40/E55/T162/T293      | inward   | outward             | 88.3 | 2.36 (424)  |
| P0AGC0 | A176/T283/V284         | inward   | outward             | 88.2 | 4.01(440)   |
| P25744 | P125/P330/S350         | outward  | Inward              | 88.2 | 4.36 (393)  |
| P0AGF4 | V35/A62/P301/T318      | Inward   | outward             | 88.1 | 3.70 (456)  |
| P45562 | S27/P233/S254          | inward   | outward             | 87.9 | 4.38 (409)  |
| P31126 | A119/T131/A333         | outward  | inward              | 87.6 | 4.89(394)   |
| P31474 | L125/L380/S389         | outward  | inward              | 87.5 | 3.66 (430)  |
| P76269 | S123/T126/S379         | outward  | inward              | 87.4 | 3.71 (433)  |
| P02920 | P31/T258/G370          | inward   | outward             | 87.3 | 4.27 (407)  |
| P0AEJ0 | I55/D163/V289/Q296     | inward   | outward             | 87.3 | 2.30 (406)  |
| P36554 | L121/T137/S388         | outward  | inward              | 87.2 | 3.92 (433)  |
| P17583 | A38/P220               | inward   | outward             | 87.1 | 3.14 (384)  |
| P76230 | A47/P288/P406          | inward   | outward<br>occluded | 87.0 | 2.46 (386)  |
| P36837 | G35/V39/P164/V312/A435 | Outward  | occluded            | 86.9 | 1.45 (469)  |
| P0AA78 | T44/P151/ L252         | inward   | outward             | 86.8 | 4.37 (414)  |
| P38055 | A133/A149/P376         | outward  | inward              | 86.7 | 5.07(445)   |
| P43531 | P57/P60/D185/V277      | inward   | outward             | 86.4 | 4.17 (407)  |
| P76242 | P35/T55/P235           | inward   | outward             | 86.2 | 4.51 (384)  |
| P52600 | P42/P296/V293/         | inward   | outward             | 86.1 | 2.03 (400)  |
| P77589 | G138/A338/S322         | outward  | inward              | 86.1 | 4.74 (395)  |
| P0C0L7 | L69/P283/V298          | occluded | outward<br>occlude  | 85.8 | 1.16 (390)  |
| P76470 | I126/A139/P296 /I318   | outward  | inward              | 85.7 | 4.33 (426)  |
| P76350 | A46/L274/P397          | occluded | outward             | 85.5 | 2.93 (425)  |
| P76417 | T245/G40/V23/A47/T249  | outward  | inward              | 85.5 | 4.30 (419)  |
| P37643 | D313/D89/L148/A368     | outward  | outward<br>occluded | 85.4 | 1.50 (386)  |
| P41036 | A130/S146/P183         | outward  | occluded            | 85.0 | 0.975 (413) |

|                               |                                    |         |          |       |            |
|-------------------------------|------------------------------------|---------|----------|-------|------------|
| P31436                        | S38/P241/T255                      | inward  | outward  | 84.6  | 4.14 (386) |
| P76197                        | P118/T322/T336                     | outward | Inward   | 84.5  | 4.27 (394) |
| P0AEX3                        | A146/T147/G159/A162/D304/A362/A371 | outward | inward   | 84.36 | 2.69 (388) |
| P0AE16                        | I126/T133/A339/A351/L340           | outward | outward  | 84.2  | 6.30 (477) |
| P75742                        | D44/P155/G288/A311                 | inward  | outward  | 84.02 | 4.62 (478) |
| P31675                        | I236/S37/P339                      | inward  | outward  | 83.7  | 4.436(385) |
| P31462                        | D63/A126/S130/S314/G318/S328       | outward | occluded | 83.5  | 3.07 (377) |
| P77304                        | G42/E156/S59/P171/P296/T297        | inward  | outward  | 82.5  | 2.92 (477) |
| P11551                        | T143/T316/S384/S370                | outward | inward   | 81.7  | 4.13(407)  |
| P33026                        | I40/P50/L241                       | inward  | outward  | 78.4  | 4.47 (388) |
| P09836                        | S89/P137/A140/T144/A370/T382       | outward | occlude  | 73.9  | 2.56 (426) |
| P08194                        | P53/E282/S292/D409/P173            | inward  | outward  | 71.5  | 4.03 (425) |
| P31442                        | P29/Q46/P149/G231/S242/A355        | inward  | outward  | 66.8  | 4.76 (382) |
| P31679                        | Failed                             |         |          |       |            |
| P39398                        | Failed                             |         |          |       |            |
| P39276                        | Failed                             |         |          |       |            |
| P77228                        | Failed                             |         |          |       |            |
| P24077                        | Failed                             |         |          |       |            |
| Q6MLJ0<br>(no <i>E.coli</i> ) | P143/L151/G372                     | outward | inward   | 91.53 | 6.20 (439) |
| Q9LT15<br>(no <i>E.coli</i> ) | T88/P308                           | inward  | outward  | 76.07 | 2.12 (450) |
| P0AAF1                        | A88/A211/T295                      | outward | inward   | 91.46 | 1.6 (373)  |
| Q9UHI5                        | Q240/I388/G392                     | inward  | outward  | 84.45 | 2.17 (433) |
| Q00325                        | G69/E142/T231                      | outward | inward   | 69.5  | 2.77 (321) |
| P78381                        | A67/I133/A138                      | inward  | outward  | 79.23 | 3.00 (294) |

\*The first column is the Uniprot number, the second column is the residue mutated to tryptophan, the third column and fourth are the wild-type conformation and mutant conformation predicted by AlphaFold2 respectively, and the fifth column is the RMSD for C $\alpha$  atoms of main chain between the two conformations.
